# Supplementary material
Source: PubMed Central journal article supplement (PMC3395758)

## Peptides that anneal to natural collagen *in vitro* and *ex vivo*

Sayani Chattopadhyay, Christopher J. Murphy, Jonathan F. McAnulty and Ronald T. Raines\*

| <b>Contents</b>                                             | <b>Page</b> |
|-------------------------------------------------------------|-------------|
| Table of Contents                                           | S1          |
| Analytical HPLC trace and MALDI–TOF mass spectrum for CMP 1 | S2          |
| Analytical HPLC trace and MALDI–TOF mass spectrum for CMP 2 | S3          |
| Analytical HPLC trace and MALDI–TOF mass spectrum for CMP 3 | S4          |
| Analytical HPLC trace and MALDI–TOF mass spectrum for CMP 4 | S5          |

CMP 1

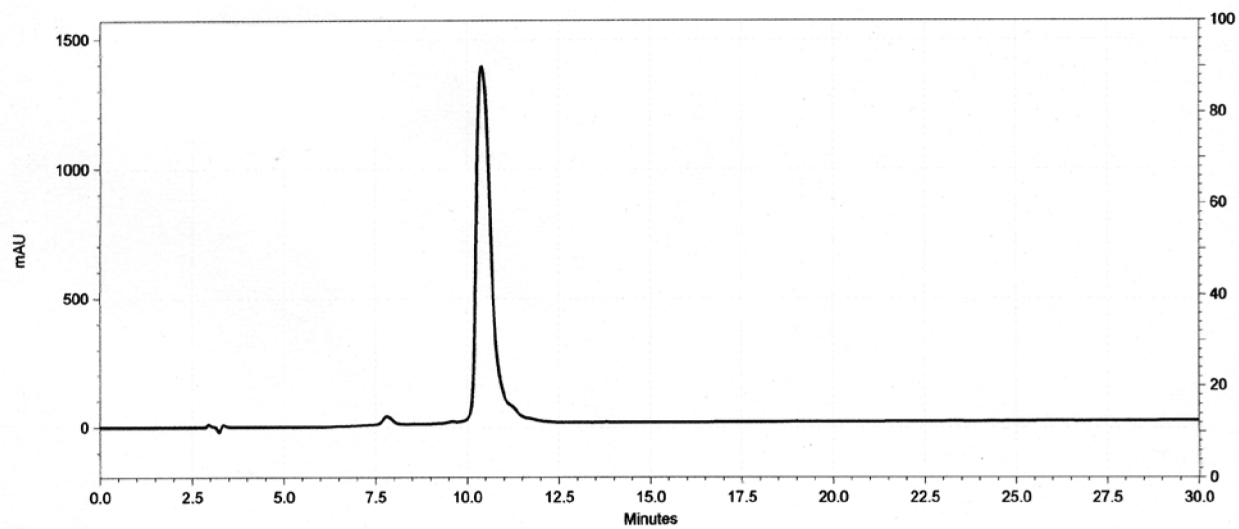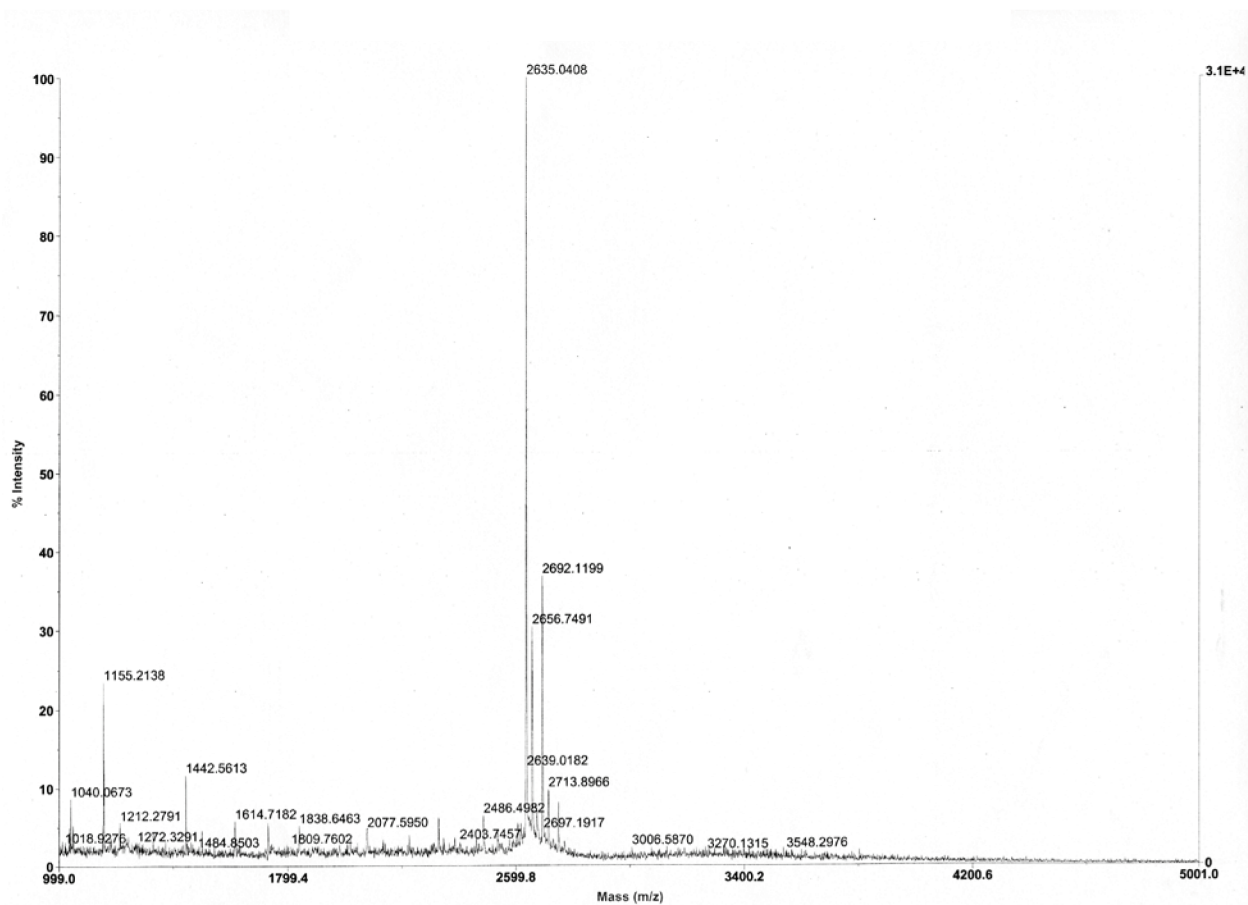

CMP 2

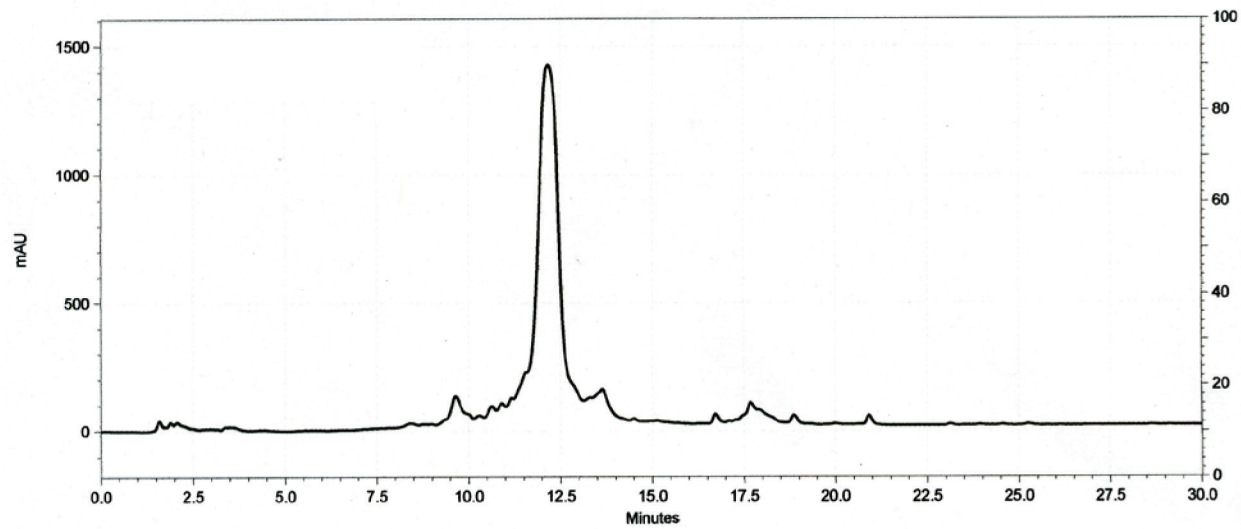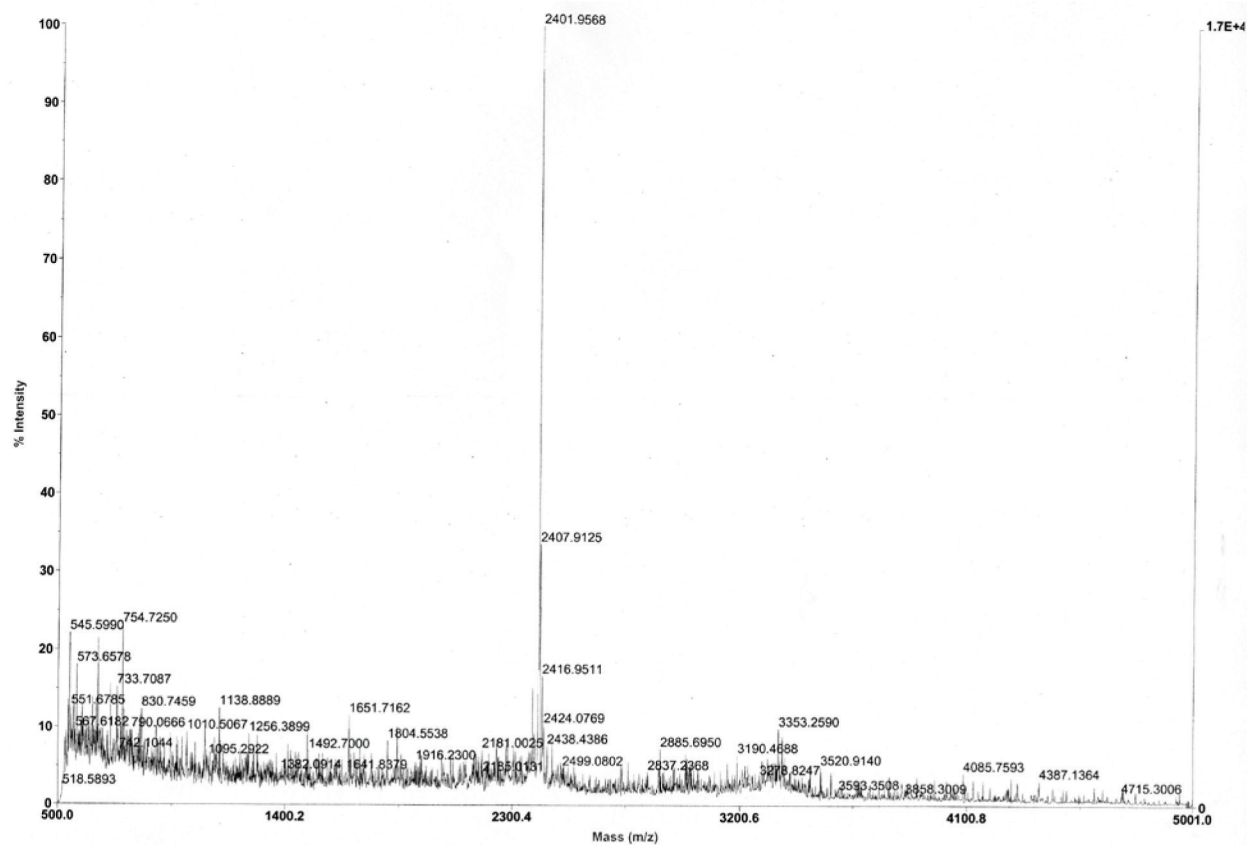

CMP 3

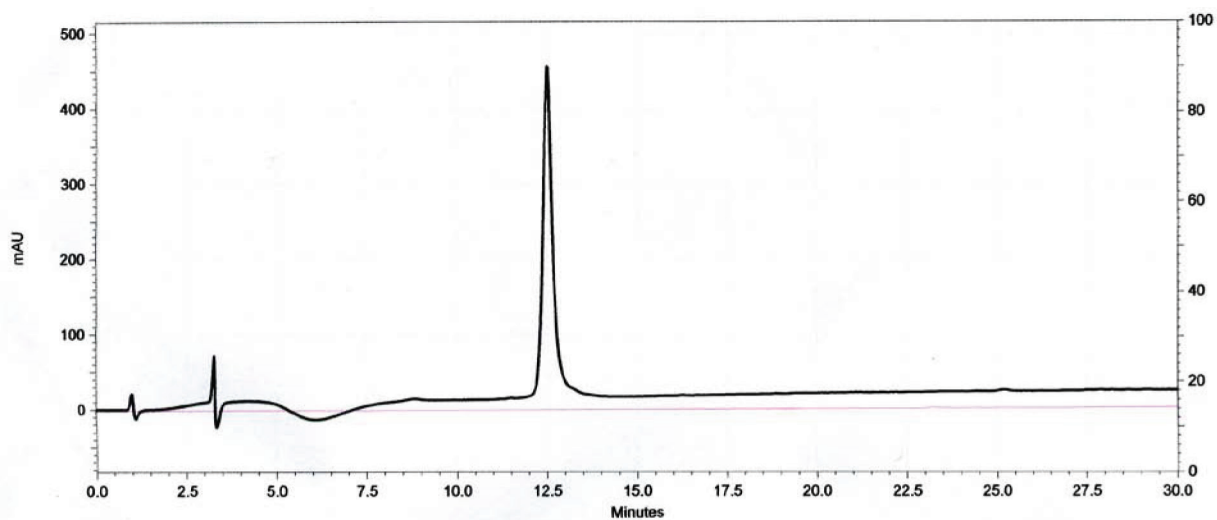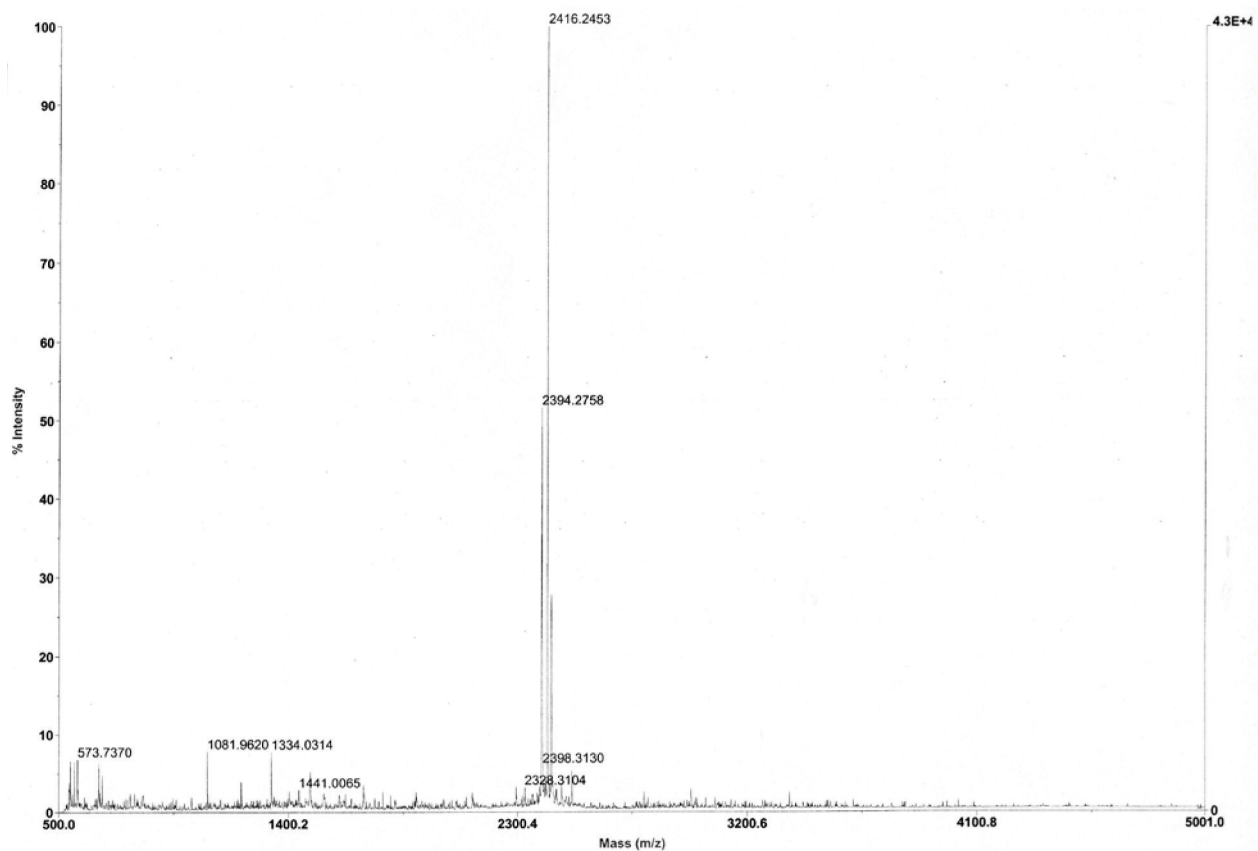

CMP 4

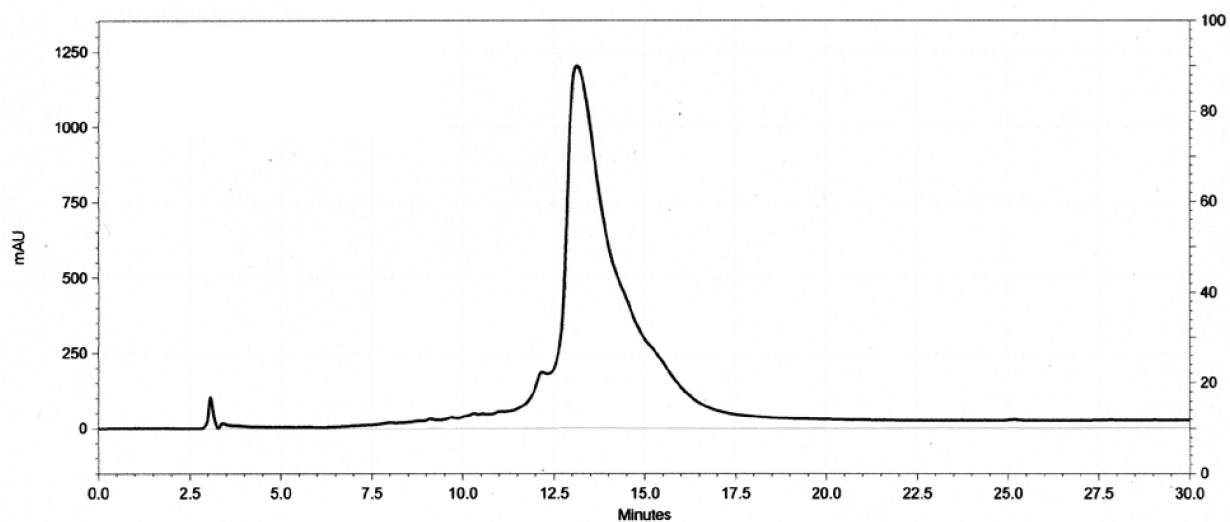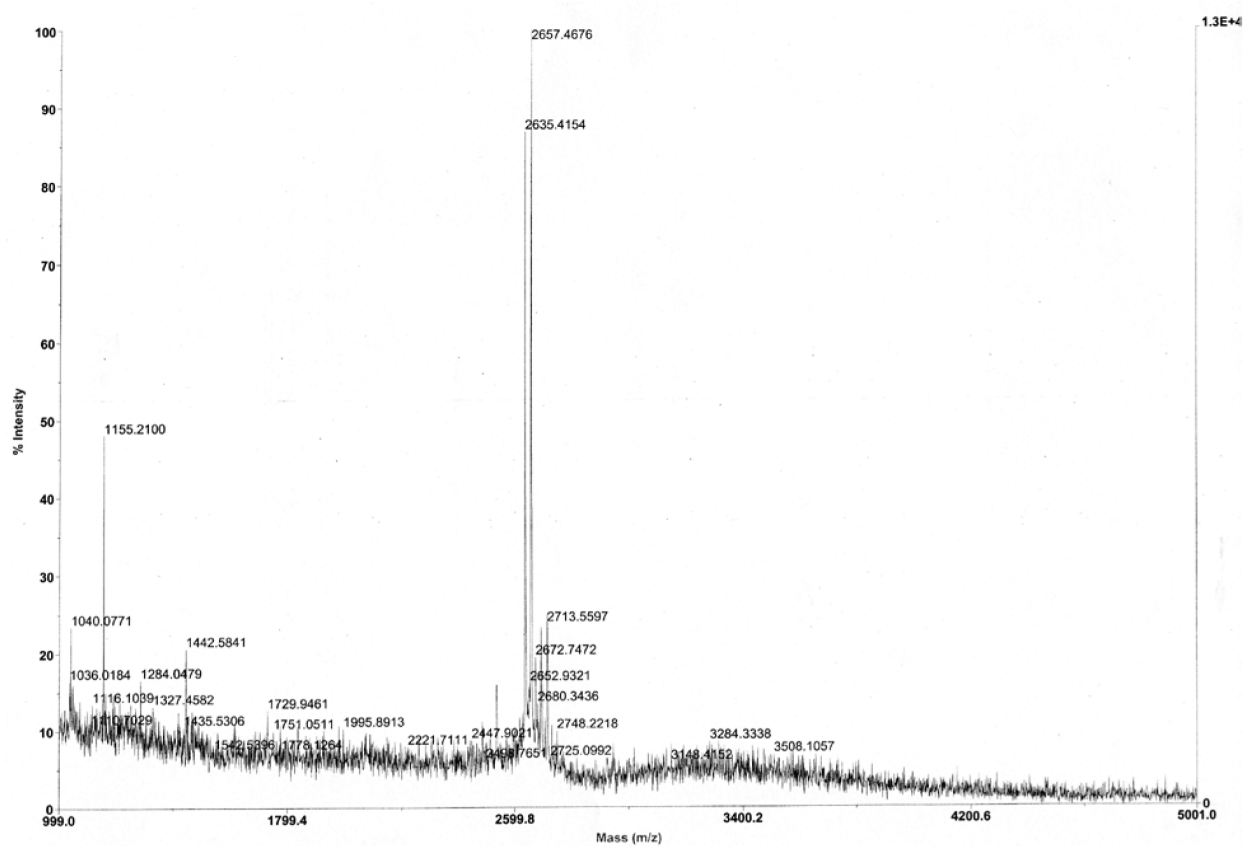

Supplement: NIHMS373044-supplement-Supplementary_Data.pdf [file NIHMS373044-supplement-Supplementary_Data.pdf]
